# Supplementary material for: Residual Foveal Cone Structure in CNGB3-Associated Achromatopsia
Source: PubMed Central journal article supplement — Invest Ophthalmol Vis Sci. 2016 Aug 1;57(10):3984–95. doi: 10.1167/iovs.16-19313 (PMC4978151; doi:10.1167/iovs.16-19313), 2016-08-01
Supplement: i1552-5783-57-10-3984-s01.pdf [file i1552-5783-57-10-3984-s01.pdf]

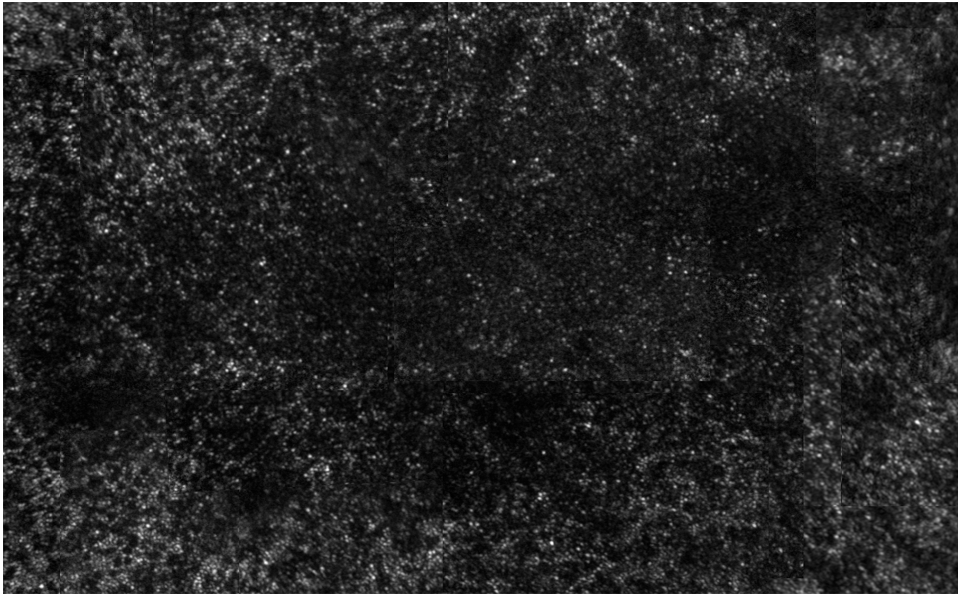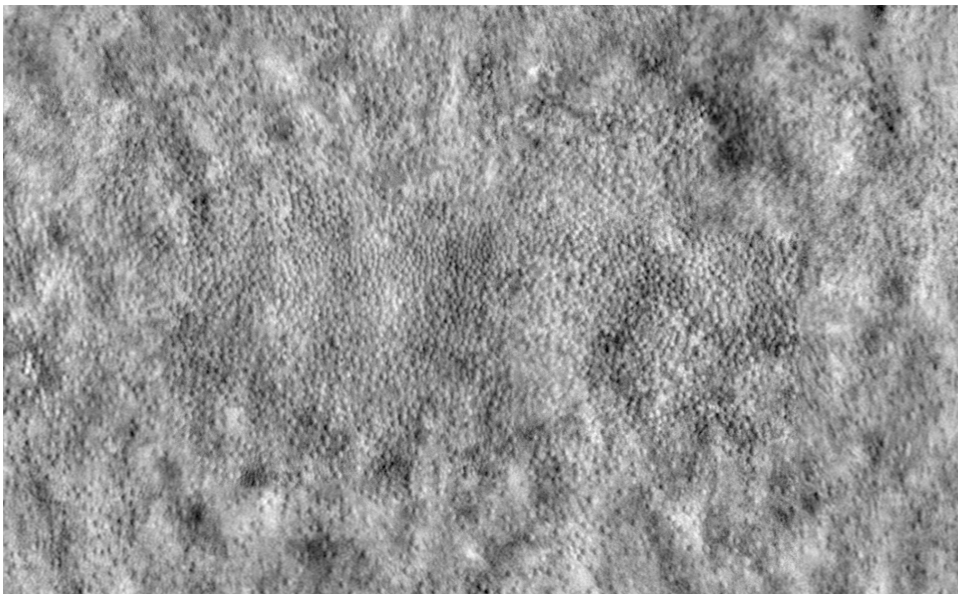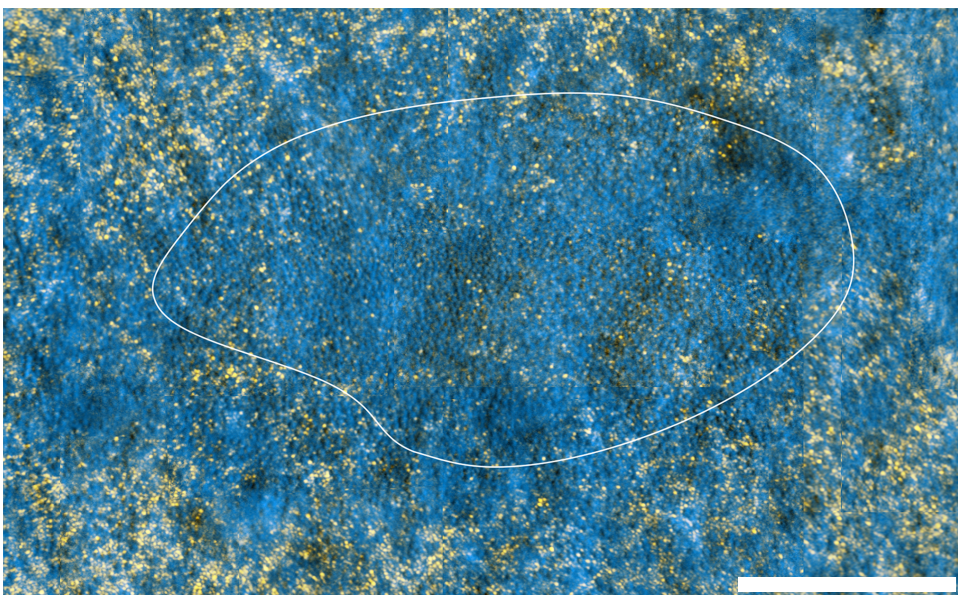

## Supplemental Figure 1 -

Approximating the rod-free zone. The foveal montage shown in these panels was extracted from a larger retinal montage of subject UFC-003. The rod-free zone is marked by observing the border of the dark foveal space and the bright rods with normal reflectivity (**top**) in relation to the cone inner segments in the rod-free region as seen with the split-detector image (**middle**). A color-merged image (bottom) where orange corresponds to the confocal image and blue the split-detector image allows for easier visualization of the rod-free area, and this image is used to manually mark the border as shown with the white outline on the color merged image. Scale bar = 250 $\mu$ m.
