# Supplementary material for: Residual Foveal Cone Structure in CNGB3-Associated Achromatopsia
Source: PubMed Central journal article supplement — Invest Ophthalmol Vis Sci. 2016 Aug 1;57(10):3984–95. doi: 10.1167/iovs.16-19313 (PMC4978151; doi:10.1167/iovs.16-19313), 2016-08-01
Supplement: i1552-5783-57-10-3984-s02.pdf [file i1552-5783-57-10-3984-s02.pdf]

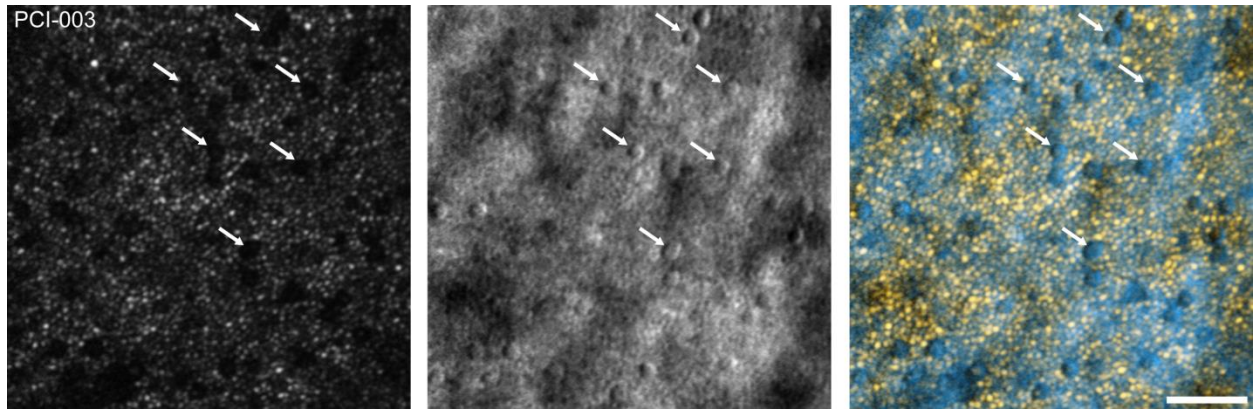

**Supplemental Figure 2** – Visualizing remnant cones in a retina with the most severe OCT phenotype. Shown are confocal (*left*) split detector (*center*), and merged (*right*) images from a subject (PCI-003) with a grade V OCT, acquired just outside of the atrophic foveal lesion. Remnant cone structure is visible as dark gaps in the confocal image and inner segment structures in the split-detector image (*arrows*), with a contiguous rod mosaic amongst the sparse cone mosaic. Scale bar= 50 $\mu$ m.
