# Supplementary material for: Residual Foveal Cone Structure in CNGB3-Associated Achromatopsia
Source: PubMed Central journal article supplement — Invest Ophthalmol Vis Sci. 2016 Aug 1;57(10):3984–95. doi: 10.1167/iovs.16-19313 (PMC4978151; doi:10.1167/iovs.16-19313), 2016-08-01
Supplement: i1552-5783-57-10-3984-s03.pdf [file i1552-5783-57-10-3984-s03.pdf]

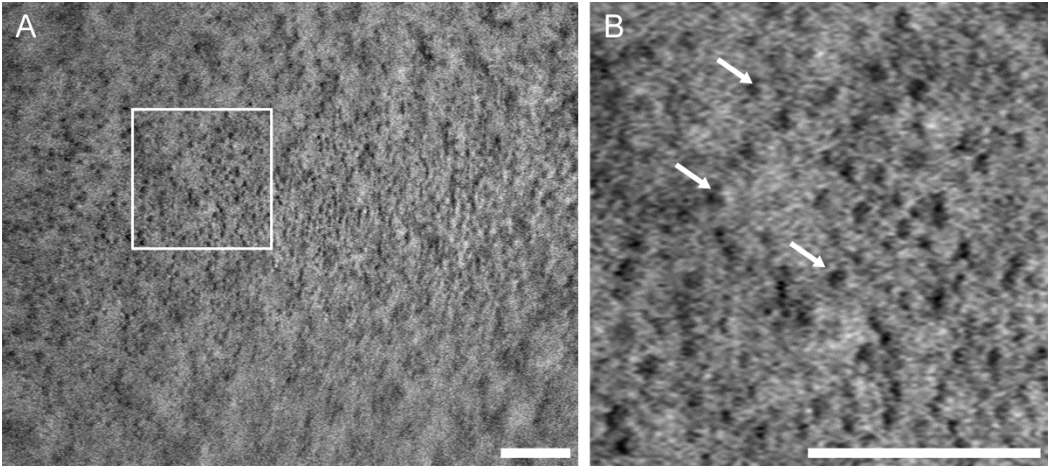

**Supplemental Figure 3** – Visualizing remnant cone structure in raw image sequences. Shown is a single raw frame from a subject (PCI-005) with nystagmus that prevented effective image registration **(A)**. **(B)** Magnified area indicated by the white box in **(A)**. Despite the inability to create a high signal-to-noise and low distortion image in these subjects, cones can still be qualitatively identified with confidence (*arrows*). Scale bars = 75 $\mu$ m.
