# Supplementary material for: Residual Foveal Cone Structure in CNGB3-Associated Achromatopsia
Source: PubMed Central journal article supplement — Invest Ophthalmol Vis Sci. 2016 Aug 1;57(10):3984–95. doi: 10.1167/iovs.16-19313 (PMC4978151; doi:10.1167/iovs.16-19313), 2016-08-01
Supplement: i1552-5783-57-10-3984-s04.pdf [file i1552-5783-57-10-3984-s04.pdf]

| Supplemental Table 1. Additional Mutations Identified |     |           |                                                                 |                                                      |
|-------------------------------------------------------|-----|-----------|-----------------------------------------------------------------|------------------------------------------------------|
| Subject #                                             | Sex | Age (yrs) | CNGB3 Genotype                                                  | Additional Mutations                                 |
| BPE-022                                               | M   | 31        | c.1148delC:p.Thr383Ilefs*13*                                    | <i>PDE6H</i> – c.35C>G:p.Ser12Ter <sup>†</sup>       |
| CEI-001                                               | M   | 18        | c.1148delC:p.Thr383Ilefs*13*                                    | <i>GNAT2</i> – c.370G>A:p.Val124Met <sup>‡,§</sup>   |
| PCI-008                                               | F   | 40        | c.1148delC:p.Thr383Ilefs*13*                                    | <i>PDE6C</i> – c.1755G>T:p.Lys585Asn <sup>‡,  </sup> |
| PCI-012                                               | F   | 8         | c.819_826del8:p.Arg274Val fs*12;<br>c.1148delC:p.Thr383Ilefs*13 | <i>CNGA3</i> – c.1618G>A:p.Val540Ile <sup>‡,#</sup>  |
| PCI-017                                               | M   | 35        | c.1148delC:p.Thr383Ilefs*13*                                    | <i>CNGA3</i> – c.513G>A:p.Trp171Ter <sup>**</sup>    |

\*Subject is homozygous for this mutation.

<sup>†</sup>This mutation was previously reported as disease causing by Kohl S, Coppieters F, Meire F, et al. A nonsense mutation in *PDE6H* causes autosomal-recessive incomplete achromatopsia. *Am J Hum Genet* 2012;91:527-532.

<sup>‡</sup>The likely pathogenicity for this mutation was determined using SIFT, PolyPhen-2, and PROVEAN analysis tools. SIFT (version 1.03 <http://sift.jcvi.org/>, accessed January 2016) results are reported to be tolerated if tolerance index > 0.05 or damaging if tolerance index ≤ 0.05. PolyPhen-2 (version 2.2.2 <http://genetics.bwh.harvard.edu/pph2/>, accessed January 2016) appraises mutations qualitatively as Benign, Possibly Damaging or Probably Damaging based on the model's false positive rate. PROVEAN (version 1.1 [http://provean.jcvi.org/human\\_protein\\_batch\\_submit.php](http://provean.jcvi.org/human_protein_batch_submit.php), accessed January 2016) results are reported as having a neutral or deleterious effect as determined by averaged delta alignment scores.

<sup>§</sup>Predicted pathogenicity is - SIFT: damaging, PolyPhen-2: possibly damaging, PROVEAN: neutral.

<sup>||</sup>Predicted pathogenicity is - SIFT: damaging, PolyPhen-2: probably damaging, PROVEAN: neutral.

<sup>#</sup>Predicted pathogenicity is - SIFT: damaging, PolyPhen-2: benign, PROVEAN: neutral.

<sup>\*\*</sup>To our knowledge this mutation has not been previously reported; the early termination of this protein is expected to be damaging.

F = female; M = male
